# Supplementary material for: Adherence to Antiplatelet Medications among Persistent and Non-Persistent Older Patients with Peripheral Arterial Disease
Source: MDPI journal article supplement (doi:10.3390/biomedicines9121800), 2021-11-30
Supplement: s1 [file s1]

**Supplementary Table S1 Multivariate analysis of the influence of patient- and medication-associated characteristics on the likelihood of non-adherence in the whole study group which included both persistent and non-persistent patients (n = 9178).**

| <b>Factor</b>                                       | <b>OR (95% CI)</b>      |
|-----------------------------------------------------|-------------------------|
| <i>Socio-demographic characteristics</i>            |                         |
| Age                                                 | 1.0 (0.99–1.01)         |
| Female sex                                          | 1.05 (0.94–1.18)        |
| University education                                | 0.81 (0.64–1.01)        |
| Employed patients                                   | 0.94 (0.73–1.22)        |
| <i>History of cardiovascular events<sup>a</sup></i> |                         |
| History of ischemic stroke                          | <b>0.79 (0.67–0.91)</b> |
| History of TIA                                      | 0.91 (0.73–1.12)        |
| History of MI                                       | 0.87 (0.68–1.11)        |
| <i>Comorbid conditions</i>                          |                         |
| Number of comorbid conditions                       | 0.94 (0.82–1.09)        |
| Arterial hypertension                               | 0.96 (0.77–1.20)        |
| Chronic heart failure                               | 1.08 (0.83–1.40)        |
| Atrial fibrillation                                 | 1.17 (0.93–1.49)        |
| Diabetes mellitus                                   | 0.91 (0.76–1.10)        |
| Hypercholesterolemia                                | 1.05 (0.87–1.27)        |
| Dementia                                            | 1.07 (0.84–1.37)        |
| Depression                                          | 1.10 (0.88–1.38)        |
| Anxiety disorders                                   | 1.05 (0.86–1.27)        |
| Parkinson's disease                                 | 1.03 (0.77–1.39)        |
| Epilepsy                                            | 1.15 (0.80–1.67)        |
| Bronchial asthma/COPD                               | <b>1.27 (1.04–1.55)</b> |
| <i>Antiplatelet agent related characteristics</i>   |                         |
| Initial antiplatelet agent                          |                         |
| Aspirin                                             | 1.00                    |
| Clopidogrel                                         | <b>0.79 (0.66–0.95)</b> |
| Ticlopidine                                         | 0.94 (0.70–1.25)        |
| Aspirin + Clopidogrel                               | <b>0.46 (0.33–0.64)</b> |
| New antiplatelet agent user <sup>b</sup>            | 0.86 (0.71–1.03)        |
| Patient's co-payment (EUR) <sup>c</sup>             | <b>0.86 (0.80–0.93)</b> |
| General practitioner as index prescriber            | <b>0.78 (0.69–0.88)</b> |

(Table continued)

| <b>Factor</b>                                         | <b>OR (95% CI)</b>      |
|-------------------------------------------------------|-------------------------|
| <i>Cardiovascular co-medication</i>                   |                         |
| Number of medications                                 | 1.01 (0.98–1.04)        |
| Number of CV medications                              | 0.99 (0.93–1.04)        |
| Anticoagulants                                        | 1.05 (0.90–1.22)        |
| Cardiac glycosides                                    | 0.86 (0.69–1.08)        |
| Antiarrhythmic agents                                 | 0.91 (0.71–1.16)        |
| Beta-blockers                                         | 0.94 (0.81–1.10)        |
| Thiazide diuretics                                    | 0.97 (0.84–1.12)        |
| Loop diuretics                                        | 1.07 (0.91–1.26)        |
| Mineralocorticoid receptor antagonists                | 1.06 (0.84–1.33)        |
| Calcium channel blockers                              | 0.98 (0.85–1.12)        |
| RAAS inhibitors                                       | 0.97 (0.82–1.14)        |
| Statins                                               | <b>0.79 (0.69–0.89)</b> |
| Lipid lowering agents other than statins <sup>d</sup> | 1.04 (0.86–1.26)        |

Values represent odds ratios (95% confidence intervals). In the case of statistical significance ( $p < 0.05$ ), the values are expressed in bold. TIA – transient ischemic attack; MI – myocardial infarction; COPD – chronic obstructive pulmonary disease; CV – cardiovascular; RAAS – renin angiotensin aldosterone system. <sup>a</sup>The time period covered by “history” – 5 years before the index date of this study. <sup>b</sup>New antiplatelet agent user – patient in whom antiplatelet treatment was initiated in association with the diagnosis of peripheral arterial disease. <sup>c</sup>Co-payment – calculated as the cost of antiplatelet treatment paid by the patient per month. <sup>d</sup>Lipid lowering agents other than statins – ezetimibe and fibrates.
