# Supplementary material for: Adherence to Antiplatelet Medications among Persistent and Non-Persistent Older Patients with Peripheral Arterial Disease
Source: MDPI journal article supplement (doi:10.3390/biomedicines9121800), 2021-11-30
Supplement: s1 [file s1]

**Supplementary Table S2 Multivariate analysis of the influence of patient- and medication-associated characteristics on the likelihood of non-adherence evaluated in models using different thresholds defining non-adherence (n = 9178)**

| Factor                                              | PDC threshold defining non-adherence |                          |                         |                          |                         |                          |                         |                          |
|-----------------------------------------------------|--------------------------------------|--------------------------|-------------------------|--------------------------|-------------------------|--------------------------|-------------------------|--------------------------|
|                                                     | PDC<50%                              |                          | PDC<60%                 |                          | PDC<70%                 |                          | PDC<90%                 |                          |
|                                                     | Persistent<br>n=6146                 | Non-persistent<br>n=3032 | Persistent<br>n=6146    | Non-persistent<br>n=3032 | Persistent<br>n=6146    | Non-persistent<br>n=3032 | Persistent<br>n=6146    | Non-persistent<br>n=3032 |
| <i>Socio-demographic characteristics</i>            |                                      |                          |                         |                          |                         |                          |                         |                          |
| Age                                                 | 1.02 (0.97–1.06)                     | 1.02 (0.97–1.07)         | 1.00 (0.98–1.03)        | 1.00 (0.97–1.02)         | 1.00 (0.99–1.02)        | 1.00 (0.98–1.02)         | 1.00 (1.00–1.01)        | 1.01 (0.99–1.02)         |
| Female sex                                          | 0.87 (0.46–1.63)                     | 1.08 (0.58–2.01)         | 1.24 (0.92–1.68)        | 1.25 (0.91–1.71)         | 1.01 (0.82–1.24)        | 1.22 (0.97–1.53)         | 0.90 (0.80–1.01)        | 1.14 (0.96–1.35)         |
| University education                                | 0.83 (0.19–3.60)                     | 0.99 (0.33–2.91)         | 0.57 (0.26–1.25)        | 1.09 (0.64–1.88)         | <b>0.60 (0.37–0.99)</b> | 0.73 (0.48–1.11)         | 0.83 (0.65–1.05)        | 1.08 (0.81–1.44)         |
| Employed patients                                   | 0.59 (0.08–4.42)                     | 0.50 (0.12–2.15)         | 0.61 (0.25–1.52)        | 0.50 (0.24–1.04)         | 0.85 (0.50–1.44)        | 0.90 (0.58–1.38)         | 0.96 (0.72–1.27)        | 0.95 (0.69–1.31)         |
| <i>History of cardiovascular events<sup>a</sup></i> |                                      |                          |                         |                          |                         |                          |                         |                          |
| History of ischemic stroke                          | 0.95 (0.42–2.12)                     | 0.80 (0.35–1.83)         | 0.89 (0.60–1.30)        | 0.70 (0.45–1.11)         | 0.89 (0.69–1.16)        | <b>0.71 (0.52–0.98)</b>  | <b>0.86 (0.74–0.99)</b> | <b>0.76 (0.60–0.95)</b>  |
| History of TIA                                      | 0.82 (0.61–1.03)                     | 0.58 (0.17–1.95)         | <b>0.44 (0.20–0.95)</b> | 0.84 (0.48–1.48)         | 0.73 (0.48–1.11)        | 1.15 (0.79–1.68)         | 0.85 (0.68–1.06)        | 1.01 (0.76–1.36)         |
| History of MI                                       | 1.10 (0.32–3.76)                     | 1.02 (0.23–4.47)         | 1.06 (0.58–1.91)        | 0.63 (0.27–1.47)         | 0.91 (0.60–1.39)        | 1.08 (0.65–1.79)         | 0.94 (0.75–1.18)        | 0.96 (0.66–1.40)         |
| <i>Comorbid conditions</i>                          |                                      |                          |                         |                          |                         |                          |                         |                          |
| Number of comorbid conditions                       | 0.55 (0.21–1.42)                     | 0.78 (0.34–1.76)         | 0.85 (0.58–1.26)        | 0.91 (0.61–1.36)         | 0.91 (0.70–1.18)        | 1.11 (0.84–1.45)         | 1.01 (0.87–1.16)        | 0.92 (0.75–1.14)         |
| Arterial hypertension                               | 3.93 (0.81–19.13)                    | 0.47 (0.16–1.41)         | 1.43 (0.76–2.68)        | 0.81 (0.46–1.41)         | 1.19 (0.78–1.80)        | 0.82 (0.55–1.22)         | 0.88 (0.69–1.11)        | 1.18 (0.87–1.60)         |
| Chronic heart failure                               | 1.39 (0.31–6.22)                     | 2.22 (0.54–9.16)         | 0.90 (0.45–1.78)        | 1.22 (0.57–2.64)         | 1.18 (0.77–1.83)        | 0.93 (0.53–1.63)         | 1.23 (0.96–1.59)        | 1.12 (0.75–1.69)         |
| Atrial fibrillation                                 | 4.09 (0.98–14.81)                    | 1.34 (0.36–5.02)         | 2.20 (0.92–4.29)        | 1.40 (0.76–2.59)         | 1.41 (0.94–2.13)        | 0.92 (0.59–1.44)         | 0.95 (0.75–1.22)        | 1.17 (0.84–1.63)         |
| Diabetes mellitus                                   | 1.34 (0.42–4.30)                     | 1.71 (0.64–4.61)         | 1.16 (0.71–1.89)        | 1.19 (0.73–1.95)         | 1.07 (0.77–1.48)        | 0.91 (0.64–1.28)         | 0.90 (0.74–1.08)        | 0.97 (0.75–1.26)         |
| Hypercholesterolemia                                | 1.91 (0.57–6.33)                     | 1.25 (0.45–3.43)         | 1.30 (0.78–2.17)        | 1.00 (0.60–1.66)         | 1.08 (0.76–1.52)        | 0.84 (0.59–1.19)         | 1.00 (0.82–1.22)        | 1.06 (0.81–1.39)         |
| Dementia                                            | 2.16 (0.58–8.00)                     | 1.33 (0.30–5.85)         | 0.98 (0.52–1.84)        | 0.79 (0.35–1.80)         | 1.23 (0.82–1.83)        | 0.58 (0.32–1.04)         | 1.04 (0.82–1.32)        | 0.89 (0.60–1.33)         |
| Depression                                          | 0.57 (0.10–3.23)                     | 0.79 (0.21–2.94)         | 0.87 (0.46–1.64)        | 1.25 (0.69–2.26)         | 0.92 (0.61–1.40)        | 0.90 (0.59–1.37)         | 1.18 (0.94–1.48)        | 0.86 (0.62–1.20)         |

(Table continued)

| Factor                                                | PDC threshold defining non-adherence |                          |                         |                          |                         |                          |                         |                          |
|-------------------------------------------------------|--------------------------------------|--------------------------|-------------------------|--------------------------|-------------------------|--------------------------|-------------------------|--------------------------|
|                                                       | PDC<50%                              |                          | PDC<60%                 |                          | PDC<70%                 |                          | PDC<90%                 |                          |
|                                                       | Persistent<br>n=6146                 | Non-persistent<br>n=3032 | Persistent<br>n=6146    | Non-persistent<br>n=3032 | Persistent<br>n=6146    | Non-persistent<br>n=3032 | Persistent<br>n=6146    | Non-persistent<br>n=3032 |
| Anxiety disorders                                     | 2.08 (0.65–6.69)                     | 1.84 (0.67–5.04)         | 0.96 (0.57–1.60)        | 1.24 (0.75–2.05)         | 0.94 (0.67–1.33)        | 0.97 (0.68–1.37)         | 1.02 (0.84–1.24)        | 1.07 (0.81–1.40)         |
| Parkinson’s disease                                   | 2.42 (0.49–11.86)                    | 2.49 (0.61–10.07)        | 1.18 (0.54–2.58)        | 0.67 (0.26–1.75)         | 1.19 (0.72–1.97)        | 0.59 (0.31–1.16)         | 0.92 (0.68–1.24)        | 1.18 (0.75–1.86)         |
| Epilepsy                                              | 1.82 (0.19–17.86)                    | <b>4.88 (1.17–20.26)</b> | 1.30 (0.47–3.59)        | <b>2.64 (1.11–6.26)</b>  | 1.19 (0.62–2.28)        | 1.28 (0.62–2.63)         | 0.94 (0.64–1.36)        | 0.81 (0.45–1.44)         |
| Bronchial<br>asthma/COPD                              | 1.12 (0.31–4.04)                     | 1.90 (0.67–5.42)         | 1.21 (0.71–2.05)        | 1.38 (0.82–2.34)         | 1.01 (0.71–1.46)        | 1.14 (0.79–1.65)         | 1.14 (0.93–1.40)        | <b>1.39 (1.04–1.85)</b>  |
| <i>Antiplatelet agent<br/>related characteristics</i> |                                      |                          |                         |                          |                         |                          |                         |                          |
| Initial antiplatelet agent                            |                                      |                          |                         |                          |                         |                          |                         |                          |
| Aspirin                                               | 1.00                                 | 1.00                     | 1.00                    | 1.00                     | 1.00                    | 1.00                     | 1.00                    | 1.00                     |
| Clopidogrel                                           | 0.60 (0.17–2.09)                     | 0.50 (0.19–1.32)         | 0.98 (0.61–1.57)        | 0.77 (0.46–1.29)         | 0.83 (0.59–1.16)        | 0.72 (0.49–1.04)         | <b>0.76 (0.63–0.91)</b> | <b>0.71 (0.55–0.92)</b>  |
| Ticlopidine                                           | 7.87 (0.92–34.98)                    | 0.29 (0.06–1.41)         | 1.44 (0.69–2.99)        | 0.85 (0.38–1.92)         | 1.41 (0.85–2.35)        | 0.97 (0.55–1.71)         | 0.90 (0.68–1.20)        | 0.67 (0.41–1.02)         |
| Aspirin + Clopidogrel                                 | 1.00 (0.22–4.55)                     | 0.77 (0.52–1.21)         | 0.43 (0.17–1.09)        | 0.14 (0.02–1.02)         | <b>0.40 (0.21–0.75)</b> | <b>0.24 (0.08–0.66)</b>  | <b>0.42 (0.32–0.57)</b> | <b>0.48 (0.30–0.76)</b>  |
| New antiplatelet agent<br>user <sup>b</sup>           | 0.88 (0.30–2.54)                     | 0.84 (0.36–1.98)         | 1.01 (0.61–1.67)        | 0.71 (0.45–1.12)         | 0.90 (0.63–1.28)        | 0.83 (0.61–1.14)         | 0.90 (0.73–1.10)        | <b>0.69 (0.54–0.87)</b>  |
| Patient’s co-payment<br>(EUR) <sup>c</sup>            | <b>0.50 (0.29–0.85)</b>              | 1.32 (0.98–1.76)         | <b>0.79 (0.64–0.98)</b> | 0.89 (0.72–1.11)         | <b>0.78 (0.68–0.91)</b> | <b>0.86 (0.73–0.99)</b>  | <b>0.86 (0.80–0.92)</b> | 0.96 (0.88–1.06)         |
| General practitioner as<br>index prescriber           | 0.53 (0.27–1.01)                     | 0.72 (0.39–1.30)         | <b>0.70 (0.51–0.96)</b> | <b>0.72 (0.53–0.98)</b>  | <b>0.70 (0.56–0.88)</b> | 0.81 (0.65–1.02)         | <b>0.76 (0.67–0.87)</b> | 0.97 (0.82–1.15)         |
| <i>Cardiovascular co-<br/>medication</i>              |                                      |                          |                         |                          |                         |                          |                         |                          |
| Number of medications                                 | 0.93 (0.78–1.09)                     | 1.14 (0.98–1.34)         | 1.01 (0.93–1.09)        | 1.07 (0.99–1.15)         | 0.98 (0.93–1.04)        | 1.03 (0.97–1.09)         | 0.99 (0.96–1.02)        | <b>1.05 (1.00–1.09)</b>  |
| Number of CV<br>medications                           | 1.17 (0.88–1.55)                     | 0.92 (0.70–1.22)         | 0.99 (0.86–1.13)        | 0.97 (0.84–1.12)         | 0.98 (0.89–1.08)        | 1.05 (0.95–1.16)         | 1.00 (0.94–1.05)        | 0.97 (0.90–1.05)         |
| Anticoagulants                                        | 1.22 (0.55–2.67)                     | 0.48 (0.19–1.22)         | 1.22 (0.84–1.79)        | 0.70 (0.46–1.06)         | 1.22 (0.94–1.59)        | 0.80 (0.60–1.06)         | 1.15 (0.98–1.34)        | 0.81 (0.64–1.01)         |
| Cardiac glycosides                                    | 0.88 (0.31–2.45)                     | 0.85 (0.18–4.16)         | 1.12 (0.68–1.86)        | 0.77 (0.36–1.62)         | 0.91 (0.64–1.30)        | 0.66 (0.38–1.16)         | 0.84 (0.68–1.04)        | <b>0.67 (0.46–0.98)</b>  |
| Antiarrhythmic agents                                 | 0.59 (0.16–2.21)                     | 0.56 (0.12–2.71)         | 0.48 (0.18–1.02)        | 0.91 (0.50–1.68)         | 0.63 (0.39–1.02)        | 0.80 (0.51–1.25)         | 0.92 (0.71–1.18)        | 1.11 (0.80–1.53)         |

(Table continued)

| Factor                                                   | PDC threshold defining non-adherence |                          |                         |                          |                         |                          |                         |                          |
|----------------------------------------------------------|--------------------------------------|--------------------------|-------------------------|--------------------------|-------------------------|--------------------------|-------------------------|--------------------------|
|                                                          | PDC<50%                              |                          | PDC<60%                 |                          | PDC<70%                 |                          | PDC<90%                 |                          |
|                                                          | Persistent<br>n=6146                 | Non-persistent<br>n=3032 | Persistent<br>n=6146    | Non-persistent<br>n=3032 | Persistent<br>n=6146    | Non-persistent<br>n=3032 | Persistent<br>n=6146    | Non-persistent<br>n=3032 |
| Beta-blockers                                            | 0.31 (0.04–1.03)                     | 1.33 (0.62–2.86)         | 0.81 (0.53–1.24)        | 1.39 (0.94–2.05)         | 0.94 (0.71–1.25)        | 1.07 (0.80–1.42)         | 0.92 (0.78–1.08)        | 0.95 (0.76–1.19)         |
| Thiazide diuretics                                       | 1.63 (0.77–3.43)                     | 1.82 (0.94–3.53)         | 0.93 (0.63–1.38)        | 1.03 (0.71–1.49)         | 0.81 (0.61–1.06)        | 0.91 (0.70–1.19)         | 1.02 (0.87–1.18)        | 0.92 (0.75–1.13)         |
| Loop diuretics                                           | 0.90 (0.37–2.15)                     | 0.58 (0.22–1.54)         | 0.92 (0.61–1.39)        | 0.83 (0.52–1.31)         | 1.23 (0.93–1.62)        | 0.73 (0.50–1.05)         | 1.21 (0.98–1.47)        | 0.83 (0.65–1.06)         |
| Mineralocorticoid<br>receptor antagonists                | 0.70 (0.20–2.39)                     | 0.46 (0.06–3.74)         | 0.80 (0.44–1.45)        | 1.17 (0.56–2.44)         | 1.06 (0.73–1.54)        | 0.87 (0.49–1.54)         | 1.09 (0.87–1.35)        | 1.16 (0.79–1.72)         |
| Calcium channel<br>blockers                              | 0.52 (0.22–1.23)                     | 1.22 (0.62–2.40)         | 0.87 (0.60–1.26)        | 0.92 (0.65–1.32)         | 0.84 (0.65–1.08)        | 0.83 (0.64–1.07)         | 0.95 (0.82–1.10)        | 1.04 (0.85–1.26)         |
| RAAS inhibitors                                          | 1.16 (0.43–3.11)                     | 0.69 (0.31–1.54)         | 1.44 (0.89–2.32)        | 0.77 (0.50–1.17)         | 1.35 (0.98–1.86)        | 0.74 (0.51–1.03)         | 1.12 (0.93–1.34)        | 0.79 (0.62–1.00)         |
| Statins                                                  | 0.57 (0.28–1.15)                     | 0.73 (0.39–1.34)         | <b>0.54 (0.39–0.76)</b> | 0.87 (0.63–1.21)         | <b>0.62 (0.49–0.78)</b> | 0.89 (0.71–1.13)         | <b>0.78 (0.68–0.90)</b> | 1.00 (0.84–1.20)         |
| Lipid lowering agents<br>other than statins <sup>d</sup> | 0.77 (0.22–2.74)                     | 1.75 (0.79–3.87)         | 1.33 (0.82–2.16)        | 0.97 (0.60–1.57)         | 0.99 (0.68–1.42)        | 1.04 (0.74–1.46)         | 0.94 (0.77–1.15)        | 1.00 (0.77–1.30)         |

Values represent odds ratios (95% confidence intervals). In the case of statistical significance ( $p < 0.05$ ), the values are expressed in bold. PDC – Proportion of Days Covered; TIA – transient ischemic attack; MI – myocardial infarction; COPD – chronic obstructive pulmonary disease; CV – cardiovascular; RAAS – renin angiotensin aldosterone system. <sup>a</sup>The time period covered by “history” – 5 years before the index date of this study. <sup>b</sup>New antiplatelet agent user – patient in whom antiplatelet treatment was initiated in association with the diagnosis of peripheral arterial disease. <sup>c</sup>Co-payment – calculated as the cost of antiplatelet treatment paid by the patient per month. <sup>d</sup>Lipid lowering agents other than statins – ezetimibe and fibrates.
