# Supplementary material for: Adherence to Antiplatelet Medications among Persistent and Non-Persistent Older Patients with Peripheral Arterial Disease
Source: MDPI journal article supplement (doi:10.3390/biomedicines9121800), 2021-11-30
Supplement: s1 [file s1]

**Supplementary Table S3 Multivariate analysis of the influence of patient- and medication-associated characteristics on the likelihood of non-adherence evaluated in the model with a shorter 3-year follow-up period and with a standard 80% threshold defining non-adherence (n = 9178).**

| <b>Factor</b>                                       | <b>Persistent<br/>n = 6419</b> | <b>Non-persistent<br/>n = 2759</b> |
|-----------------------------------------------------|--------------------------------|------------------------------------|
| <i>Socio-demographic characteristics</i>            |                                |                                    |
| Age                                                 | 1.01 (0.99–1.02)               | 1.00 (0.98–1.01)                   |
| Female sex                                          | 0.87 (0.75–1.01)               | 1.16 (0.96–1.39)                   |
| University education                                | 0.77 (0.56–1.06)               | 0.98 (0.71–1.35)                   |
| Employed patients                                   | 0.97 (0.67–1.38)               | 0.89 (0.62–1.27)                   |
| <i>History of cardiovascular events<sup>a</sup></i> |                                |                                    |
| History of ischemic stroke                          | 0.89 (0.74–1.07)               | <b>0.73 (0.56–0.94)</b>            |
| History of TIA                                      | 0.86 (0.65–1.13)               | 0.97 (0.70–1.35)                   |
| History of MI                                       | 0.84 (0.62–1.14)               | 1.12 (0.74–1.68)                   |
| <i>Comorbid conditions</i>                          |                                |                                    |
| Number of comorbid conditions                       | 0.95 (0.79–1.14)               | 1.00 (0.80–1.26)                   |
| Arterial hypertension                               | 1.03 (0.76–1.39)               | 0.97 (0.70–1.35)                   |
| Chronic heart failure                               | 1.21 (0.88–1.66)               | 0.80 (0.50–1.29)                   |
| Atrial fibrillation                                 | 0.98 (0.72–1.33)               | 1.26 (0.87–1.82)                   |
| Diabetes mellitus                                   | 0.97 (0.76–1.22)               | 0.87 (0.65–1.16)                   |
| Hypercholesterolemia                                | 0.97 (0.76–1.25)               | 0.95 (0.70–1.27)                   |
| Dementia                                            | 1.11 (0.83–1.49)               | 0.84 (0.53–1.32)                   |
| Depression                                          | 1.26 (0.95–1.67)               | 0.79 (0.55–1.14)                   |
| Anxiety disorders                                   | 1.01 (0.79–1.29)               | 1.01 (0.75–1.35)                   |
| Parkinson's disease                                 | 1.14 (0.79–1.63)               | 1.16 (0.71–1.91)                   |
| Epilepsy                                            | 1.16 (0.73–1.83)               | 0.95 (0.50–1.80)                   |
| Bronchial asthma/COPD                               | 1.23 (0.95–1.59)               | 1.26 (0.92–1.72)                   |
| <i>Antiplatelet agent related characteristics</i>   |                                |                                    |
| Initial antiplatelet agent                          |                                |                                    |
| Aspirin                                             | 1.00                           | 1.00                               |
| Clopidogrel                                         | 0.79 (0.62–1.01)               | <b>0.71 (0.53–0.96)</b>            |
| Ticlopidine                                         | 1.27 (0.88–1.83)               | 0.65 (0.40–1.03)                   |
| Aspirin + Clopidogrel                               | <b>0.43 (0.28–0.65)</b>        | <b>0.44 (0.25–0.79)</b>            |
| New antiplatelet agent user <sup>b</sup>            | 0.96 (0.74–1.25)               | <b>0.71 (0.54–0.92)</b>            |
| Patient's co-payment (EUR) <sup>c</sup>             | <b>0.81 (0.74–0.90)</b>        | 0.93 (0.83–1.04)                   |
| General practitioner as index prescriber            | <b>0.77 (0.65–0.91)</b>        | 0.85 (0.70–1.02)                   |

(Table continued)

| Factor                                                | Persistent<br>n = 6419  | Non-persistent<br>n = 2759 |
|-------------------------------------------------------|-------------------------|----------------------------|
| <i>Cardiovascular co-medication</i>                   |                         |                            |
| Number of medications                                 | 0.99 (0.95–1.03)        | 1.03 (0.98–1.08)           |
| Number of CV medications                              | 1.01 (0.94–1.08)        | 0.99 (0.91–1.08)           |
| Anticoagulants                                        | 1.15 (0.95–1.40)        | 0.81 (0.64–1.03)           |
| Cardiac glycosides                                    | 0.92 (0.70–1.19)        | 0.67 (0.43–1.04)           |
| Antiarrhythmic agents                                 | 1.10 (0.81–1.50)        | 0.74 (0.51–1.07)           |
| Beta-blockers                                         | 0.84 (0.68–1.03)        | 1.14 (0.90–1.45)           |
| Thiazide diuretics                                    | 0.83 (0.68–1.01)        | 1.03 (0.83–1.29)           |
| Loop diuretics                                        | 1.16 (0.95–1.42)        | 0.94 (0.72–1.23)           |
| Mineralocorticoid receptor antagonists                | 0.98 (0.75–1.30)        | 0.99 (0.63–1.55)           |
| Calcium channel blockers                              | 0.95 (0.79–1.14)        | 0.96 (0.78–1.19)           |
| RAAS inhibitors                                       | 1.15 (0.91–1.44)        | 0.82 (0.63–1.06)           |
| Statins                                               | <b>0.72 (0.61–0.85)</b> | 0.94 (0.77–1.14)           |
| Lipid lowering agents other than statins <sup>d</sup> | 1.04 (0.81–1.35)        | 1.14 (0.85–1.51)           |

Values represent odds ratios (95% confidence intervals). In the case of statistical significance ( $p < 0.05$ ), the values are expressed in bold. TIA – transient ischemic attack; MI – myocardial infarction; COPD – chronic obstructive pulmonary disease; CV – cardiovascular; RAAS – renin angiotensin aldosterone system. <sup>a</sup>The time period covered by “history” – 5 years before the index date of this study. <sup>b</sup>New antiplatelet agent user – patient in whom antiplatelet treatment was initiated in association with the diagnosis of peripheral arterial disease. <sup>c</sup>Co-payment – calculated as the cost of antiplatelet treatment paid by the patient per month. <sup>d</sup>Lipid lowering agents other than statins – ezetimibe and fibrates.
